# Supplementary material for: Standardized Assessment of LLM English Proficiency
Source: Research Square preprint supplement (doi:10.21203/rs.3.rs-8820245/v1), 2026-02-19
Supplement: Supplementary file 1 [file 4b0f630fc55cfa9f36d949ca.docx]

**Appendix**

For **Qwen2.5-Instruct CrossAttn (RAG)**, we query DeepSeek-R1 to generate a short knowledge snippet. The snippet is prepended to the standard MCQA input. We use the following instruction, where {} is replaced by the full item text.

| **Knowledge-generation prompt** Instruction: You are a helpful assistant.  Input: Provide the necessary knowledge required to correctly answer the question {input}. You only need to output the essential knowledge in a concise English manner, without any additional content. Please note that the knowledge should not be specific to the question but rather general facts.  Response: |
| --- |

Across these item types, the snippet supplies a small piece of decision-critical knowledge, ranging from pronunciation or stress cues, to collocation meaning contrasts, to the tense and modality pattern required by counterfactual conditionals.

Table1. Representative knowledge snippets generated by DeepSeek-R1

| **Subskill** | **Item** | **Generated knowledge snippet** |
| --- | --- | --- |
| Phonology | In the following words, which underlined part -*oa* has a different pronunciation from the others?  A. coat B. road  C. broad D. goal | The pronunciation of the underlined part -*oa* in each word is: coat /oʊ/, road /oʊ/, broad /ɔː/, goal /oʊ/. |
| Vocabulary | We cannot trust him. He always ___ some excuses for doing something wrong.  A. makes up B. sets up  C. takes up D. puts up | *Make up* means to invent or fabricate an explanation. *Set up* means to establish or arrange. *Take up* means to begin an activity or occupy time or space. *Put up* means to tolerate or display. |
| Syntax | If it ___ for his invitation the other day, I should not be here now.  A. had not been B. should not be  C. were not to be D. should not have been | For unreal past conditions, the if clause typically uses the past perfect. When the result affects the present, the main clause often uses would, could, or should plus the base verb. The pattern “if it had not been for” means “without” a past event. |
